# Supplementary material for: Unlocking phenotypic plasticity provides novel insights for immunity and personalized therapy in lung adenocarcinoma
Source: Front Genet. 2022 Sep 6;13:941567. doi: 10.3389/fgene.2022.941567 (PMC9486167; doi:10.3389/fgene.2022.941567)
Supplement: Supplementary file 1 [file Table1.XLSX]

## Sheet: Sheet1
Supplementary Table S1 Primers design and their sequences of the top 10 UPP-related genes
Number	Gene Primer	Base sequence(5'to 3')	base number	Purification method
1	ACAN-F1	ACGGCTTCTGGAGACAGGACTG	22	tPAGE
2	ACAN-R1	CTGGGATGCTGGTGCTGATGAC	22	tPAGE
3	BMP2-F1	TCCCGACAGAACTCAGTGCTATCTC	25	tPAGE
4	BMP2-R1	GACACCCACAACCCTCCACAAC	22	tPAGE
5	CDKN3-F1	ACTGCTATGGAGGACTTGGGAGATC	25	tPAGE
6	CDKN3-R1	TGGCTTGCTCTGGTGATATTGTGTC	25	tPAGE
7	GRIN2A-F1	TAACCCTTTCCTCCACTCCCACAG	24	tPAGE
8	GRIN2A-R1	TGACCTCAAGGACGACCGAAGATAG	25	tPAGE
9	IL17A-F1	GACCTCATTGGTGTCACTGCTACTG	25	tPAGE
10	IL17A-R1	TCTTGTCCTCAGAATTTGGGCATCC	25	tPAGE
11	KCNQ2-F1	AGCACAGGCAGAAGCACTTTGAG	23	tPAGE
12	KCNQ2-R1	CGAGAGGTTGGTGGCGTAGAATC	23	tPAGE
13	SELP-F1	GCAGACCTTCAGGACAATGGACAG	24	tPAGE
14	SELP-R1	CAGAGGTTGGAGCAGTTCATCGC	23	tPAGE
15	SLC6A4-F1	TGTCATCTTCACAGTGCTCGGTTAC	25	tPAGE
16	SLC6A4-R1	TGGCATGTTGGCTATCGCTTCTG	23	tPAGE
17	TIMP1-F1	ATCCTGTTGTTGCTGTGGCTGATAG	25	tPAGE
18	TIMP1-R1	CGCTGGTATAAGGTGGTCTGGTTG	24	tPAGE
19	UCHL1-F1	AACCCCGAGATGCTGAACAAAGTG	24	tPAGE
20	UCHL1-R1	GAGCCCAGAGACTCCTCTTCCAG	23	tPAGE
21	GAPDH-F1	GGACCTGACCTGCCGTCTAG	20	tPAGE
22	GAPDH-R1	GTAGCCCAGGATGCCCTTGA	20	tPAGE
